# Supplementary material for: Investigation of the adiabatic assumption for estimating cloud micro- and macrophysical properties from satellite and ground observations
Source: Copernicus journal article supplement (doi:10.5194/acp-16-933-2016), 2016-01-26
Supplement: Supplementary file 1 [file acp-16-933-2016-supplement.zip]

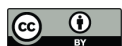

## *Supplement of*

# **Investigation of the adiabatic assumption for estimating cloud micro- and macrophysical properties from satellite and ground observations**

**D. Merk et al.**

*Correspondence to:* D. Merk (merk@tropos.de)

- acp-16-933-2016-supplement-title-page.pdf
- 20111027\_lacros\_fad.png
- 20120601\_lacros\_fad.png
- 20120927\_lacros\_fad.png
- 20130421\_lacros\_fad.png

The copyright of individual parts of the supplement might differ from the CC-BY 3.0 licence.
